# Supplementary material
Source: MDPI journal article supplement (https://www.mdpi.com/1999-4907/13/6/907)

**Supplementary materials to:**

**Water uptake and hormone modulation responses to nitrogen supply in *Populus simonii* under drought stress**

Supplementary materials and methods

*Antioxidant enzyme activities*

To analyze the activities of antioxidant enzymes in roots or leaves, soluble proteins were extracted as described previously. The activity of SOD was determined according to the method of (Becana et al., 1986). One unit of SOD was defined as the amount of enzyme that caused a 50% decrease in the SOD-inhibited nitrobluetetrazolium reduction at 550 nm. The activities of POD, CAT, and APX were measured as described by (Ekmekci and Terzioglu, 2005) (Kato and Shimizu, 1987) (He et al., 2011).

- Becana, M., P. Aparicio-Tejo, J.J. Irigoyen, and M. Sanchez-Diaz. 1986. Some enzymes of hydrogen peroxide metabolism in leaves and root nodules of *Medicago sativa*. *Plant physiology* 82:1169-1171.
- Ekmekci, Y., and S. Terzioglu. 2005. Effects of oxidative stress induced by paraquat on wild and cultivated wheats. *Pesticide Biochemistry and Physiology* 83:69-81.
- He, J.L., J.J. Qin, L.Y. Long, Y.L. Ma, H. Li, K. Li, X.N. Jiang, T.X. Liu, A. Polle, Z.S. Liang, and Z.B. Luo. 2011. Net cadmium flux and accumulation reveal tissue-specific oxidative stress and detoxification in *Populus x canescens*. *Physiologia plantarum* 143:50-63.
- Kato, M., and S. Shimizu. 1987. Chlorophyll metabolism in higher plants. VII. Chlorophyll degradation in senescing tobacco leaves; phenolic-dependent peroxidative degradation. *Canadian Journal of Botany* 65:729-735.

**Supplementary Table S1.** Primers used for qRT-PCR.

| Gene model       | Gene Name       | Closest AGI | Primer-Forward (5'-3')   | Primer-Reverse(5'-3')     | PCR efficiency (%) |
|------------------|-----------------|-------------|--------------------------|---------------------------|--------------------|
| Potri.008G065600 | <i>PIP1;2</i>   | AT4G00430   | GCCATTTGATGAAGTTTGTTC    | GCACGCGCTTGCTTATAGGT      | 104                |
| Potri.009G136600 | <i>PIP2;1</i>   | AT4G35100   | GATCGGATTATGATGGACCTTTCT | AAACTACCCGTGACAATGATACACA | 97                 |
| Potri.019G030900 | <i>SIP1;2</i>   | AT3G04090   | GTTGGCTATCATGGAGGTGATG   | TGCAAGTCCACCTGCAAAGTA     | 95                 |
| Potri.006G121700 | <i>TIP1;6</i>   | AT2G36830   | ACTGGTGGCCTGGAAACCT      | CACGATCTCGAGAACGAAAGC     | 103                |
| Potri.001G186700 | <i>TIP2;1</i>   | AT3G16240   | CCTCTTGTTGGTGGTGGGATT    | TCCGGACAAAGGAGTATGATCA    | 98                 |
| Potri.010G044500 | <i>TAA1</i>     | AT1G70560   | TTGGCGAAGGTTGTAGGACT     | ATCTCGTGGGTACTTTGGCA      | 101                |
| Potri.002G254200 | <i>YUCCA1</i>   | AT4G28720   | CAGCAATGTCCCCTATTGGC     | GAGACCGGCATTTTCCTTTCC     | 94                 |
| Potri.008G174600 | <i>YUCCA3</i>   | AT1G04610   | GACCTGTCATAGTTGGGGCT     | GCGATCATAGGTGCGGTTTT      | 103                |
| Potri.001G393800 | <i>NCED3</i>    | AT4G18350   | AACTTGCTCGGTCGAAAGAC     | ACAGGACACCAGGCTATACCA     | 94                 |
| Potri.009G037300 | <i>PP2C</i>     | AT1G07430   | GACAAGGCGTGCTCTG         | CCCCTTAACCTTATCACTCA      | 102                |
|                  | <i>Actin2/7</i> |             | CCCATTGAGCACGGTATTGT     | TACGACCACTGGCATAACAGG     | 97                 |

**Supplementary Table S2.** Growth parameters of *P.simonii* as affected by experimental drought and nitrogen supply.

| N supply<br>(mM) | Drought<br>treatment | Root biomass<br>(mg DW) | Total fine<br>root length<br>(m) | Total fine<br>root<br>surface<br>area (cm <sup>2</sup> ) | Total root<br>volume(cm <sup>3</sup> ) | Aerial<br>biomass<br>(mg DW) | Chlorophyll<br>l content<br>(SPAD) | ΔH(cm)    |
|------------------|----------------------|-------------------------|----------------------------------|----------------------------------------------------------|----------------------------------------|------------------------------|------------------------------------|-----------|
| 0.01             | Control              | 5.6±0.4a                | 13.6±0.7a                        | 57.6±2.3a                                                | 12.7±0.5a                              | 7.5±0.4a                     | 24.6±1.8a                          | 28.3±1.4a |
|                  | Drought              | 2.3±0.2c                | 5.8±0.4b                         | 29.5±1.1c                                                | 4.2±0.3b                               | 4.6±0.6b                     | 12.7±0.6b                          | 11.7±0.6b |
| 1                | Control              | 4.2±0.2b                | 11.8±0.6a                        | 40.3±1.4b                                                | 11.7±0.6a                              | 7.1±0.4a                     | 25.5±2.3a                          | 25.5±1.8a |
|                  | Drought              | 2.6±0.2c                | 6.8±0.3b                         | 31.4±1.2c                                                | 4.0±0.2b                               | 5.2±0.3b                     | 17.3±1.0b                          | 11.1±0.7b |
| P-values         | N                    | ***                     | ns                               | ***                                                      | ns                                     | ns                           | ns                                 | ns        |
|                  | Drought              | *                       | ***                              | ***                                                      | ***                                    | ***                          | ***                                | ***       |
|                  | Drought×<br>N        | **                      | *                                | ***                                                      | ns                                     | ns                           | ns                                 | ns        |

Data indicate mean± SE (n=6). Different letters in the same column indicate significant difference. P-values of the ANOVAs of drought, nitrogen supply, and their interaction are indicated. \*P< 0.05; \*\*P< 0.01; \*\*\* P< 0.001; ns, not significant.

**Supplementary Figure S1.** The typical root state of *P.simonii* as affected by experimental drought and nitrogen supply.

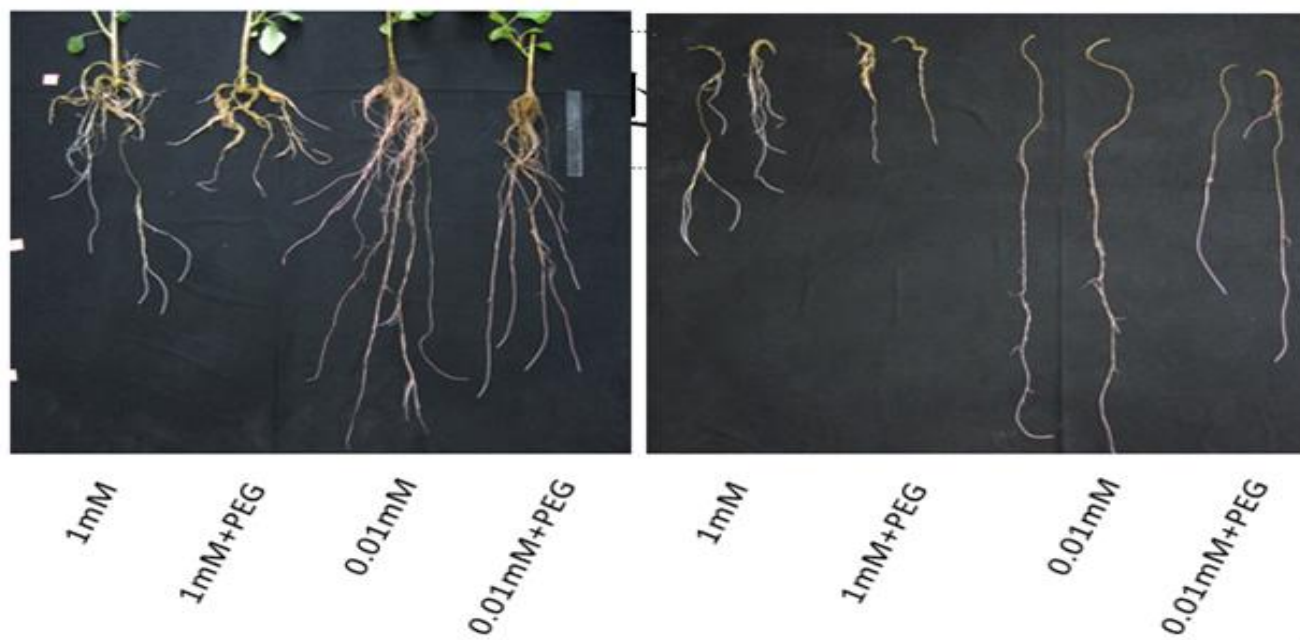

**Supplementary Table S3.** The concentrations of 17 free amino acids in fine roots and leaves of *P.simonii* as affected by experimental drought and nitrogen supply.

|               |              | Asp  | Lys  | Ile  | Met  | Thr  | Ser  | Cys  | Gly  | Pro  | Glu  | His  |
|---------------|--------------|------|------|------|------|------|------|------|------|------|------|------|
| <b>Root</b>   | 0.01 mM      | 0.10 | 0.06 | 0.01 | 0.00 | 0.04 | 0.06 | 0.01 | 0.05 | 0.04 | 0.17 | 0.02 |
|               |              | 0.08 | 0.06 | 0.03 | 0.01 | 0.05 | 0.04 | 0.01 | 0.05 | 0.03 | 0.15 | 0.01 |
|               |              | 0.11 | 0.04 | 0.03 | 0.01 | 0.06 | 0.06 | 0.01 | 0.07 | 0.04 | 0.17 | 0.01 |
|               | 0.01 mM +PEG | 0.10 | 0.13 | 0.05 | 0.01 | 0.06 | 0.03 | 0.01 | 0.07 | 0.12 | 0.07 | 0.03 |
|               |              | 0.10 | 0.15 | 0.05 | 0.01 | 0.06 | 0.04 | 0.02 | 0.05 | 0.11 | 0.08 | 0.02 |
|               |              | 0.11 | 0.12 | 0.04 | 0.02 | 0.05 | 0.04 | 0.01 | 0.04 | 0.11 | 0.05 | 0.02 |
|               | 1 mM         | 0.16 | 0.10 | 0.02 | 0.01 | 0.05 | 0.09 | 0.02 | 0.08 | 0.09 | 0.23 | 0.04 |
|               |              | 0.21 | 0.07 | 0.02 | 0.01 | 0.03 | 0.08 | 0.03 | 0.07 | 0.08 | 0.25 | 0.03 |
|               |              | 0.22 | 0.11 | 0.05 | 0.02 | 0.05 | 0.11 | 0.03 | 0.08 | 0.09 | 0.23 | 0.04 |
|               | 1 mM +PEG    | 0.30 | 0.28 | 0.11 | 0.01 | 0.16 | 0.10 | 0.02 | 0.08 | 0.18 | 0.25 | 0.06 |
|               |              | 0.27 | 0.25 | 0.13 | 0.01 | 0.14 | 0.13 | 0.03 | 0.09 | 0.18 | 0.26 | 0.04 |
|               |              | 0.31 | 0.25 | 0.11 | 0.01 | 0.17 | 0.14 | 0.02 | 0.12 | 0.19 | 0.26 | 0.06 |
| <b>Leaves</b> | 0.01 mM      | 0.32 | 0.22 | 0.16 | 0.02 | 0.32 | 0.16 | 0.02 | 0.01 | 0.20 | 0.40 | 0.07 |
|               |              | 0.32 | 0.23 | 0.18 | 0.03 | 0.34 | 0.15 | 0.02 | 0.02 | 0.22 | 0.38 | 0.07 |
|               |              | 0.30 | 0.25 | 0.18 | 0.03 | 0.32 | 0.12 | 0.03 | 0.02 | 0.19 | 0.38 | 0.09 |
|               | 0.01 mM +PEG | 0.39 | 0.23 | 0.16 | 0.04 | 0.34 | 0.16 | 0.04 | 0.20 | 0.17 | 0.40 | 0.08 |
|               |              | 0.37 | 0.23 | 0.21 | 0.02 | 0.32 | 0.21 | 0.03 | 0.23 | 0.15 | 0.41 | 0.09 |
|               |              | 0.37 | 0.25 | 0.15 | 0.02 | 0.31 | 0.17 | 0.04 | 0.21 | 0.17 | 0.37 | 0.08 |
|               | 1 mM         | 0.42 | 0.20 | 0.16 | 0.12 | 0.20 | 0.16 | 0.03 | 0.02 | 0.16 | 0.12 | 0.03 |
|               |              | 0.38 | 0.18 | 0.22 | 0.15 | 0.25 | 0.16 | 0.03 | 0.03 | 0.17 | 0.11 | 0.05 |

|           |      |      |      |      |      |      |      |      |      |      |      |
|-----------|------|------|------|------|------|------|------|------|------|------|------|
|           | 0.38 | 0.21 | 0.17 | 0.16 | 0.23 | 0.15 | 0.04 | 0.05 | 0.13 | 0.08 | 0.05 |
| 1 mM +PEG | 0.51 | 0.43 | 0.34 | 0.09 | 0.25 | 0.44 | 0.04 | 0.32 | 0.22 | 0.62 | 0.11 |
|           | 0.63 | 0.48 | 0.39 | 0.09 | 0.31 | 0.48 | 0.03 | 0.35 | 0.28 | 0.65 | 0.12 |
|           | 0.55 | 0.47 | 0.37 | 0.10 | 0.33 | 0.49 | 0.03 | 0.33 | 0.27 | 0.64 | 0.12 |

**Supplementary Table S3.** Continued

|               |              | Arg  | Tyr  | Phe  | Ala  | Val  | Leu  |
|---------------|--------------|------|------|------|------|------|------|
| <b>Root</b>   | 0.01 mM      | 0.05 | 0.02 | 0.06 | 0.06 | 0.03 | 0.05 |
|               |              | 0.04 | 0.02 | 0.05 | 0.06 | 0.04 | 0.05 |
|               |              | 0.04 | 0.02 | 0.05 | 0.08 | 0.02 | 0.06 |
|               | 0.01 mM +PEG | 0.05 | 0.03 | 0.06 | 0.06 | 0.03 | 0.06 |
|               |              | 0.03 | 0.03 | 0.07 | 0.07 | 0.04 | 0.08 |
|               |              | 0.04 | 0.02 | 0.06 | 0.07 | 0.03 | 0.06 |
|               | 1 mM         | 0.10 | 0.03 | 0.08 | 0.10 | 0.03 | 0.07 |
|               |              | 0.10 | 0.02 | 0.08 | 0.10 | 0.04 | 0.07 |
|               |              | 0.12 | 0.03 | 0.09 | 0.08 | 0.03 | 0.11 |
|               | 1 mM +PEG    | 0.13 | 0.03 | 0.09 | 0.12 | 0.13 | 0.10 |
|               |              | 0.13 | 0.03 | 0.08 | 0.11 | 0.09 | 0.16 |
|               |              | 0.12 | 0.04 | 0.08 | 0.11 | 0.07 | 0.12 |
| <b>Leaves</b> | 0.01 mM      | 0.18 | 0.12 | 0.21 | 0.20 | 0.14 | 0.13 |
|               |              | 0.17 | 0.10 | 0.22 | 0.23 | 0.16 | 0.17 |
|               |              | 0.15 | 0.09 | 0.24 | 0.19 | 0.17 | 0.16 |

|              |      |      |      |      |      |      |
|--------------|------|------|------|------|------|------|
| 0.01 mM +PEG | 0.18 | 0.09 | 0.20 | 0.18 | 0.13 | 0.13 |
|              | 0.14 | 0.08 | 0.18 | 0.21 | 0.12 | 0.14 |
|              | 0.19 | 0.08 | 0.20 | 0.19 | 0.18 | 0.18 |
| 1 mM         | 0.02 | 0.19 | 0.42 | 0.23 | 0.03 | 0.35 |
|              | 0.03 | 0.24 | 0.41 | 0.26 | 0.03 | 0.42 |
|              | 0.02 | 0.27 | 0.43 | 0.24 | 0.07 | 0.38 |
| 1 mM +PEG    | 0.29 | 0.15 | 0.30 | 0.31 | 0.27 | 0.46 |
|              | 0.28 | 0.14 | 0.27 | 0.30 | 0.28 | 0.42 |
|              | 0.25 | 0.15 | 0.32 | 0.32 | 0.30 | 0.49 |

**Supplementary Table S4.** PCA of morphological and physiological responses of *P. simonii* as affected

by experimental drought and nitrogen supply. In addition to the two-PC plots in Figure 9, the three dimensional PC plots were also presented here.

| Variables                            | PC1    | PC2    | PC3    | PC4    | PC5    | PC6    |
|--------------------------------------|--------|--------|--------|--------|--------|--------|
| Root biomass                         | -0.045 | 0.016  | 0.044  | 0.096  | 0.122  | -0.014 |
| Leaf biomass                         | -0.038 | 0.045  | 0.133  | 0.121  | 0.087  | 0.052  |
| Height increment                     | -0.046 | 0.029  | 0.006  | 0.030  | -0.047 | 0.021  |
| Total root length                    | -0.047 | 0.022  | 0.029  | -0.001 | 0.047  | -0.029 |
| Total root surface area              | -0.040 | 0.033  | 0.078  | 0.095  | 0.155  | -0.094 |
| Total root volume                    | -0.039 | 0.007  | -0.016 | 0.142  | -0.034 | 0.059  |
| Net photosynthetic rate (A)          | -0.047 | 0.033  | 0.048  | 0.000  | 0.015  | -0.026 |
| Stomatal conductance ( $g_s$ )       | -0.049 | -0.008 | -0.003 | -0.033 | -0.034 | 0.012  |
| Transpiration rate (E)               | -0.047 | 0.032  | -0.032 | -0.004 | -0.025 | -0.015 |
| Chlorophyll content                  | -0.040 | -0.012 | 0.077  | -0.162 | -0.042 | 0.069  |
| RWC                                  | -0.045 | -0.013 | 0.000  | 0.025  | -0.017 | -0.003 |
| Water use efficiency(WUE)            | 0.020  | 0.104  | -0.069 | 0.012  | -0.020 | -0.242 |
| Electrolyte leakage                  | 0.013  | 0.042  | 0.140  | -0.224 | 0.062  | 0.163  |
| Root C concentrations                | -0.043 | -0.016 | -0.017 | 0.062  | -0.089 | 0.133  |
| Root $\Delta^{13}C$                  | 0.011  | -0.048 | -0.073 | 0.018  | 0.471  | -0.165 |
| Leaf C concentrations                | 0.012  | 0.002  | 0.043  | -0.267 | 0.342  | -0.210 |
| Leaf $\Delta^{13}C$                  | 0.003  | -0.033 | 0.109  | -0.219 | -0.167 | -0.394 |
| Root N concentrations                | -0.016 | -0.107 | -0.075 | 0.098  | -0.072 | -0.002 |
| Root $\Delta^{15}N$                  | 0.044  | 0.055  | -0.003 | -0.010 | 0.006  | -0.073 |
| Leaf N concentrations                | -0.016 | -0.105 | -0.121 | -0.125 | -0.062 | -0.092 |
| Leaf $\Delta^{15}N$                  | 0.043  | 0.034  | 0.093  | 0.079  | 0.080  | 0.083  |
| Root O <sub>2</sub> - concentrations | -0.001 | -0.030 | -0.232 | 0.163  | 0.221  | 0.161  |
| Leaf O <sub>2</sub> - concentrations | 0.034  | 0.058  | -0.137 | 0.090  | -0.132 | -0.080 |
| Root MDA                             | 0.041  | -0.002 | -0.101 | 0.052  | 0.036  | 0.173  |
| Leaf MDA                             | 0.038  | 0.015  | -0.134 | -0.073 | -0.034 | -0.002 |
| Root SOD                             | -0.016 | 0.017  | -0.049 | -0.303 | 0.142  | 0.445  |
| Leaf SOD                             | 0.039  | -0.034 | 0.161  | 0.038  | 0.015  | 0.040  |
| Root POD                             | 0.028  | -0.077 | 0.132  | 0.104  | 0.116  | 0.108  |
| Leaf POD                             | 0.033  | -0.081 | 0.082  | 0.009  | 0.068  | 0.147  |
| Root APX                             | 0.019  | -0.074 | 0.134  | -0.009 | -0.221 | 0.221  |
| Leaf APX                             | 0.037  | 0.035  | -0.022 | 0.091  | 0.003  | 0.037  |
| Root CAT                             | 0.022  | -0.093 | 0.065  | 0.105  | 0.088  | -0.152 |
| Leaf CAT                             | 0.021  | -0.063 | 0.182  | 0.132  | -0.052 | -0.128 |
| Root soluble sugar                   | 0.048  | -0.009 | -0.013 | -0.010 | -0.013 | 0.100  |
| Leaf soluble sugar                   | 0.047  | -0.032 | -0.016 | -0.027 | -0.027 | 0.052  |



|                             |        |       |        |        |        |        |
|-----------------------------|--------|-------|--------|--------|--------|--------|
| Root soluble phenolics      | 0.043  | 0.035 | 0.040  | 0.028  | 0.027  | -0.027 |
| Leaf soluble phenolics      | 0.025  | 0.096 | -0.003 | -0.044 | -0.066 | 0.079  |
| Root IAA                    | 0.010  | 0.122 | 0.084  | 0.088  | 0.046  | 0.001  |
| Leaf IAA                    | -0.013 | 0.111 | 0.137  | 0.080  | 0.071  | 0.097  |
| Root ABA                    | 0.045  | 0.023 | 0.087  | 0.013  | 0.018  | 0.040  |
| Leaf ABA                    | 0.035  | 0.082 | -0.092 | -0.031 | -0.096 | -0.058 |
| Proportion of variation (%) | 49.27  | 18.24 | 6.75   | 4.98   | 3.81   | 3.08   |

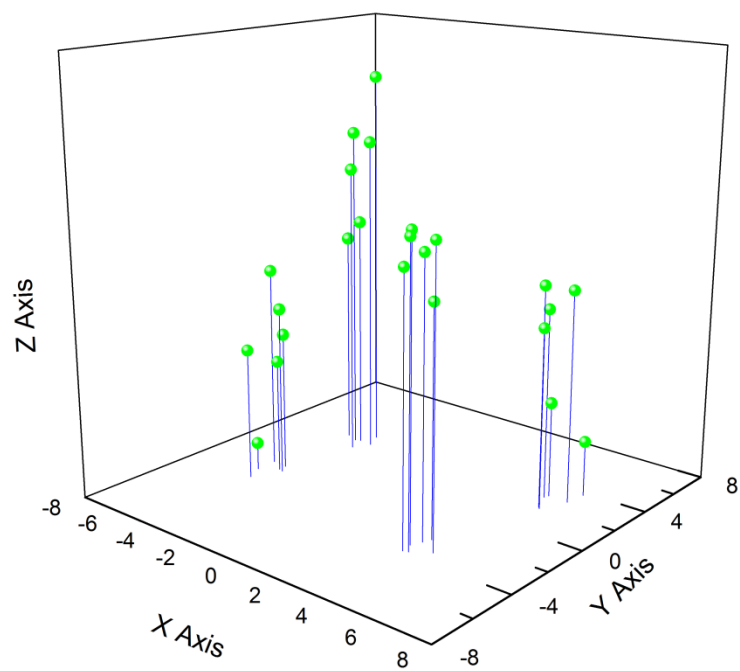

Supplement: s1 [file s1]
